# Supplementary material for: Genome-Wide Footprints of Pig Domestication and Selection Revealed through Massive Parallel Sequencing of Pooled DNA
Source: PubMed Central journal article supplement (PMC3070695; doi:10.1371/journal.pone.0014782), 2011-04-04

**Figure S2** –  $F_{st}$  values (A) and p-values frequency (B) presented by breed pair. (A) x axis is the chromosome from SSC1 to SSC18 and finally SSCX.

(A)

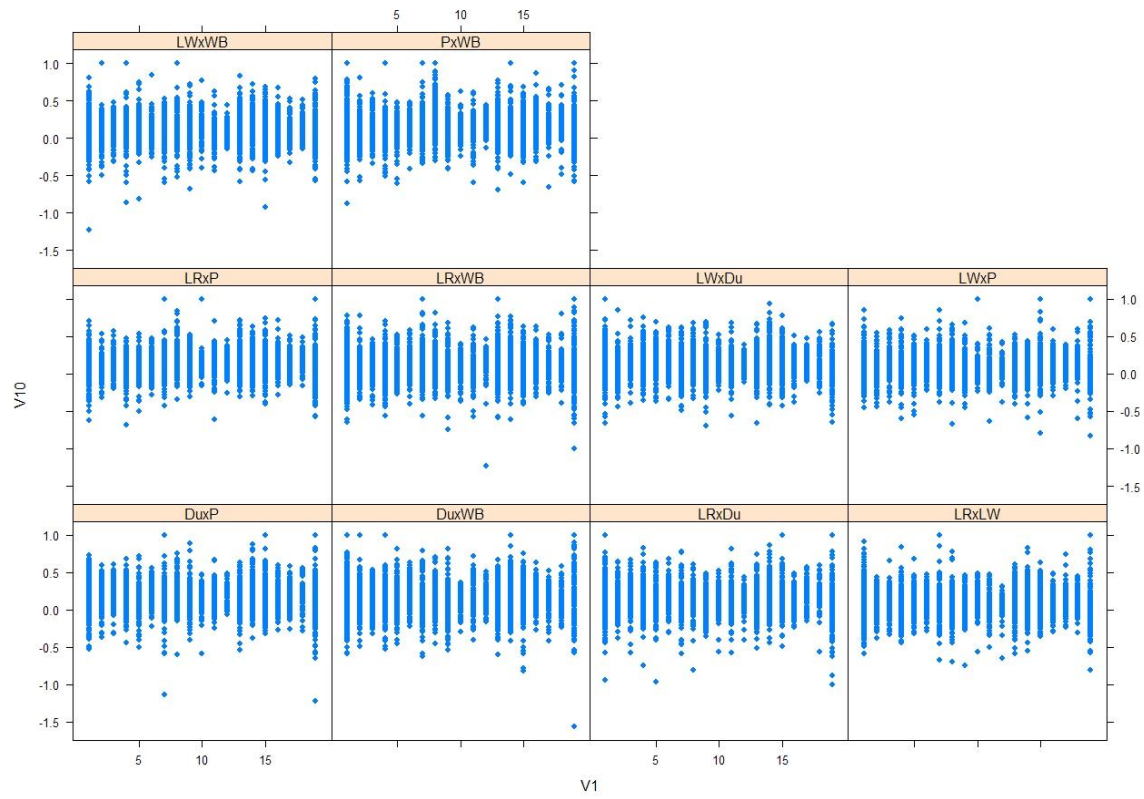

(B)

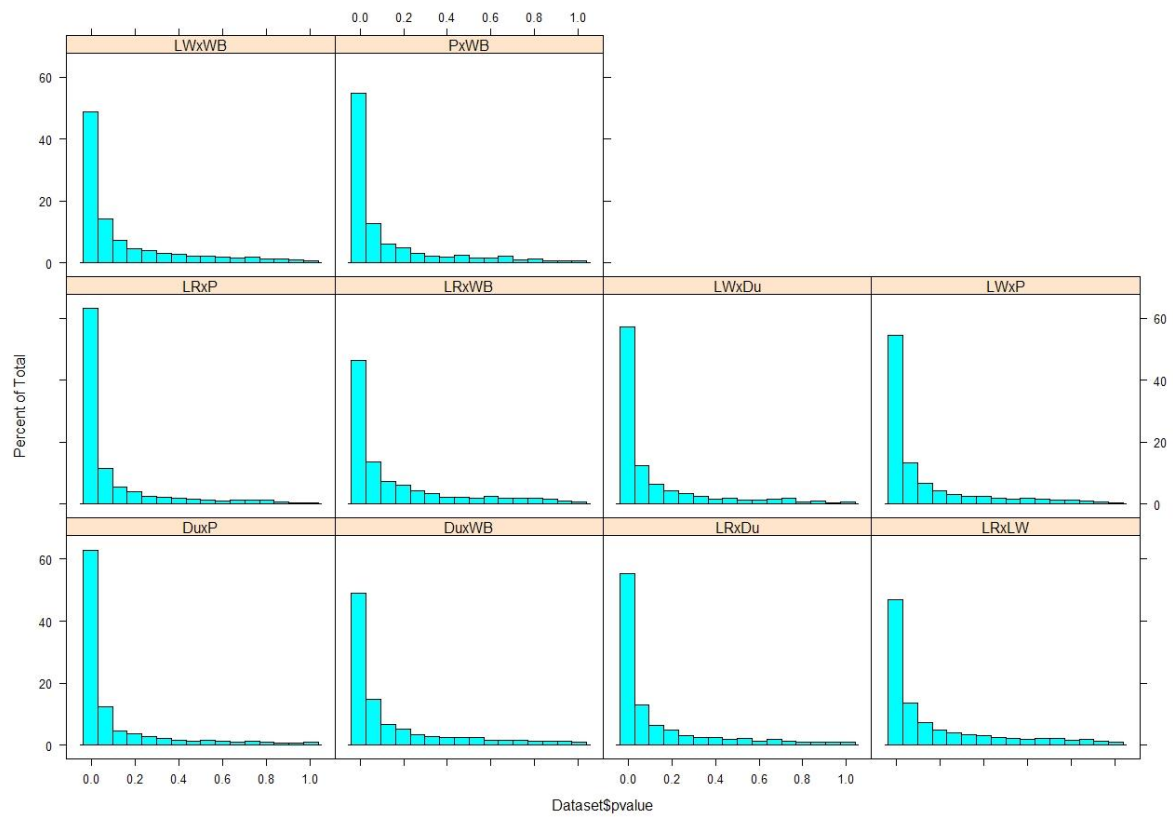

Supplement: pone.0014782.s002.pdf [file pone.0014782.s002.pdf]
