# Supplementary material for: Genome-Wide Footprints of Pig Domestication and Selection Revealed through Massive Parallel Sequencing of Pooled DNA
Source: PubMed Central journal article supplement (PMC3070695; doi:10.1371/journal.pone.0014782), 2011-04-04
Supplement: pone.0014782.s004.pdf [file pone.0014782.s004.pdf]

**Table S2-** Summary of genes related to neuron function and that overlap with genomic regions with significant low  $\hat{\theta}_w$ .

| <b>Position (Mb)</b> | <b>Breed</b> | $\hat{\theta}_w$ ( $\times 10^{-4}$ ) | <b>95% CI</b> ( $\times 10^{-3}$ ) | <b>Overlapping gene</b> |
|----------------------|--------------|---------------------------------------|------------------------------------|-------------------------|
| SSC12:15-15.5        | Landrace     | 6.45                                  | 1.1-2.7                            | <i>PPP1R1B</i>          |
|                      | Duroc        | 5.69                                  | 1.0-2.7                            |                         |
|                      | Large White  | 8.0                                   | 1.1-2.9                            |                         |
| SSC2:94.5-95         | Landrace     | 9.81                                  | 1.4-3.8                            | <i>LRRTM2</i>           |
|                      | Pietrain     | 10.4                                  | 1.4-3.5                            |                         |
|                      | Large White  | 13.6                                  | 1.4-4.0                            |                         |
| SSC12:8.5-9          | Landrace     | 6.8                                   | 1.0-2.7                            | <i>CACGN4</i>           |
|                      | Pietrain     | 10.5                                  | 1.2-2.6                            |                         |
| SSC10:30.5-31        | Landrace     | 5.2                                   | 0.9-2.8                            | <i>LINGO2</i>           |
| SSC11:39-39.5        | Pietrain     | 4.6                                   | 0.8-2.5                            | <i>CLN5</i>             |
|                      | Large White  | 5.9                                   | 0.7-2.6                            |                         |
| SSC14:54-54.5        | Pietrain     | 3.5                                   | 0.7-2.0                            | <i>HRK</i>              |
|                      | Duroc        | 4.5                                   | 0.4-1.9                            |                         |
| SSC5:19-19.5         | Large White  | 6.2                                   | 0.9-3.2                            | <i>KIF5A</i>            |
| SSCX:6-6.5           | Pietrain     | 1.9                                   | 0.5-2.2                            | <i>GPM6B</i>            |
|                      | Large White  | 1.8                                   | 0.3-2.4                            |                         |
| SSC6:19-19.5         | Landrace     | 5.8                                   | 0.8-2.3                            | <i>CACNG6</i>           |
|                      | Duroc        | 8.1                                   | 0.9-2.7                            |                         |
|                      | Landrace     | 5.8                                   | 0.8-2.3                            | <i>CACGN8</i>           |
|                      | Duroc        | 8.1                                   | 0.9-2.7                            |                         |
|                      | Landrace     | 10.5                                  | 1.2-2.9                            | <i>CACGN7</i>           |

|                 |             |      |         |               |
|-----------------|-------------|------|---------|---------------|
|                 | Duroc       | 8.1  | 0.9-2.7 |               |
| SSC3:35.5-36    | Landrace    | 3.2  | 0.8-2.3 | <i>LRRTM4</i> |
|                 | Pietrain    | 4.9  | 0.5-1.9 |               |
| SSC12:35.5-36   | Landrace    | 10.5 | 1.2-2.9 | <i>ENO2</i>   |
| SSC7:58-58.5    | Duroc       | 4.1  | 0.5-2.3 | <i>AP3B2</i>  |
| SSCX:61-61.5    | Landrace    | 0    | 0.1-1.8 | <i>DCX</i>    |
| SSC4:44-44.5    | Landrace    | 3.7  | 0.5-2.1 | <i>NECAB1</i> |
|                 | Large White | 3.6  | 0.4-2   |               |
| SSCX:6-6.5      | Pietrain    | 2.0  | 0.4-2.2 | <i>GPM6B</i>  |
|                 | Duroc       | 2.1  | 0.2-1.9 |               |
| SSC7:81-81.5    | Landrace    | 4.2  | 0.5-2.2 | <i>CPNE6</i>  |
|                 | Large White | 7.0  | 0.7-2.8 |               |
| SSC14:127-127.5 | Large White | 5.7  | 0.7-2.5 | <i>SMNDC1</i> |
|                 | Duroc       | 6.6  | 0.7-2.4 |               |
| SSC1:228-228.5  | Duroc       | 2.8  | 0.4-2.1 | <i>NR4A3</i>  |
| SSC5:2.5-3      | Large White | 9.7  | 1.0-3.5 | <i>SEPT3</i>  |
| SSC3:2.5-3      | Pietrain    | 11.9 | 1.2-2.9 | <i>LRCH4</i>  |
| SSC7:104.5-105  | Duroc       | 7.4  | 0.7-2.8 | <i>PNMA1</i>  |
| SSC7:79-79.5    | Pietrain    | 6.6  | 0.7-2.4 | <i>NOVA1</i>  |
| SSC1:           | Landrace    |      |         | <i>TMOD2</i>  |

**Table S2-** Summary of genes related to brain function and that overlap with genomic regions with significant low  $\hat{\theta}_w$ .

| <b>Position (Mb)</b> | <b>Breed</b> | $\hat{\theta}_w$ ( $\times 10^{-4}$ ) | <b>95% CI (<math>\times 10^{-3}</math>)</b> | <b>Overlapping gene</b> |
|----------------------|--------------|---------------------------------------|---------------------------------------------|-------------------------|
| SSC3:43.5-44         | Landrace     | 2.2                                   | 0.8-2.7                                     | <i>TTBK1</i>            |
|                      | Pietrain     | 7.1                                   | 0.9-2.7                                     |                         |
| SSC2:44.5-45         | Landrace     | 2.0                                   | 0.6-2.2                                     | <i>TMEM59L</i>          |
|                      | Large White  | 4.9                                   | 0.6-2.3                                     |                         |
|                      | Pietrain     | 6.0                                   | 0.6-1.8                                     |                         |
| SSC12:13-13.5        | Landrace     | 7.1                                   | 1.0-2.6                                     | <i>KCNH4</i>            |
|                      | Duroc        | 8.1                                   | 1.0-2.6                                     |                         |
| SSC4:81.5-82         | Duroc        | 1.4                                   | 0.4-2.1                                     | <i>BRP44</i>            |
|                      | Large White  | 3.6                                   | 0.4-2.2                                     |                         |
|                      | Landrace     | 4.0                                   | 0.4-1.9                                     |                         |
| SSC2:22.5-23         | Duroc        | 4.3                                   | 0.7-2.6                                     | <i>BDNF</i>             |
| SSC13:132-132.5      | Duroc        | 6.0                                   | 0.8-2.9                                     | <i>DYRK1A</i>           |
| SSC12:24-24.5        | Duroc        | 7.6                                   | 0.9-2.6                                     | <i>SEPT4</i>            |
|                      | Large White  | 10                                    | 1.1-2.8                                     |                         |
| SSC13:23.5-24        | Pietrain     | 6.5                                   | 0.8-2.3                                     | <i>CSPG5</i>            |
|                      | Duroc        | 5.8                                   | 0.7-2.6                                     |                         |
| SSC7:43.5-44         | Pietrain     | 7.1                                   | 0.9-2.6                                     | <i>TTBK1</i>            |
| SSC8:54-54.5         | Duroc        | 5.6                                   | 0.7-2.9                                     | <i>POU4F2</i>           |
| SSC15:53.5-54        | Pietrain     | 0                                     | 0.2-1.1                                     | <i>TBR1</i>             |
| SSC15:56.5-57        | Large White  | 0                                     | 0.2-1.5                                     | <i>SCN1A, SCN2A,</i>    |
|                      | Duroc        | 2.2                                   | 0.4-1.9                                     | <i>SCN3A</i>            |

---

|                |             |     |         |                 |
|----------------|-------------|-----|---------|-----------------|
| SSC2:44.5-45   | Large White | 4.9 | 0.6-2.4 | <i>TMEM59L</i>  |
|                | Pietrain    | 6.0 | 0.6-1.9 |                 |
| SSC5:3-3.5     | Pietrain    | 9.7 | 1.1-2.9 | <i>L3MBTL2</i>  |
| SSC5:10.5-11   | Duroc       | 6.0 | 0.7-2.7 | <i>RIC8B</i>    |
| SSC5:5.5-6     | Large White | 8.7 | 0.9-3.3 | <i>BAIAP2L2</i> |
| SSC9:104.5-105 | Duroc       | 8.8 | 0.9-3.0 | <i>VWC2</i>     |
| SSCX:23.5-24   | Pietrain    | 1.5 | 0.2-1.4 | <i>TMEM47</i>   |
| SSC7:81.5-82   | Landrace    | 6.0 | 0.5-2.3 | <i>SLC22A17</i> |

---
