# Supplementary material for: Genome-Wide Footprints of Pig Domestication and Selection Revealed through Massive Parallel Sequencing of Pooled DNA
Source: PubMed Central journal article supplement (PMC3070695; doi:10.1371/journal.pone.0014782), 2011-04-04
Supplement: pone.0014782.s005.pdf [file pone.0014782.s005.pdf]

**Table S3-** Summary of genes related to growth, muscle development, metabolism and disease that overlap with genomic regions with significant low  $\hat{\theta}_w$ .

| Position(Mb)                               | Breed       | $\hat{\theta}_w$ ( $\times 10^{-4}$ ) | 95%CI( $\times 10^{-3}$ ) | Overlapping gene |
|--------------------------------------------|-------------|---------------------------------------|---------------------------|------------------|
| <b>VEGF signaling pathway</b>              |             |                                       |                           |                  |
| SSC7:35.5-36                               | Duroc       | 9.64                                  | 0.96-3.4                  | MAPK14           |
|                                            | Pietrain    | 8.05                                  | 1-2.9                     |                  |
| SSC12:37-37.5                              | Duroc       | 9.04                                  | 1.1-2.8                   | PIK3R5           |
|                                            | Wild boar   | 6.43                                  | 0.8-2.5                   |                  |
| SSC4:104-104.5                             | Landrace    | 7.00                                  | 1-3.1                     | KRAS             |
|                                            | Large white | 6.94                                  | 0.7-2.75                  |                  |
|                                            | Pietrain    | 7.69                                  | 0.9-2.6                   |                  |
| SSC7:81-81.5                               | Landrace    | 4.23                                  | 0.5-2.2                   | NFATC4           |
|                                            | Large white | 7.05                                  | 0.7-2.7                   |                  |
| SSC17:39-39.5                              | Large white | 7.76                                  | 1-3.2                     | PLCG1            |
| SSC6:19-19.5                               | Duroc       | 8.14                                  | 0.8-2.7                   | PRKCG            |
|                                            | Landrace    | 5.83                                  | 0.8-2.3                   |                  |
| SSC14:51.5-52                              | Landrace    | 4.25                                  | 0.7-2.4                   | MAPK1            |
|                                            | Large white | 2.86                                  | 0.4-1.9                   |                  |
|                                            | Pietrain    | 6.30                                  | 0.6-1.9                   |                  |
| SSC8:74.5-75                               | Pietrain    | 4.51                                  | 0.5-1.8                   | PLA2G12A         |
| SSC12:2-2.5                                | Large white | 11.41                                 | 1.2-3.1                   | SPHK1            |
|                                            | Pietrain    | 11.68                                 | 1.2-2.6                   |                  |
| SSC9:108-108.5                             | Duroc       | 6.92                                  | 1-3.2                     | MAPKAPK2         |
|                                            | Large white | 8.41                                  | 0.8-2.8                   |                  |
|                                            | Pietrain    | 6.71                                  | 1.1-2.8                   |                  |
| <b>Arachidonic acid metabolism pathway</b> |             |                                       |                           |                  |
| SSC8:75.5-76                               | Duroc       | 9.94                                  | 1-3.5                     | CYP2U1           |
|                                            | Landrace    | 10.3                                  | 1-3.5                     |                  |
| SSC14:95.5-96                              | Landrace    | 7.35                                  | 0.8-2.4                   | ALOX5            |
|                                            | Large white | 3.69                                  | 0.5-2.1                   |                  |
| SSC17:34.5-35                              | Landrace    | 3.28                                  | 0.8-2.5                   | GGT7             |
|                                            | Large white | 9.65                                  | 0.9-3.1                   |                  |
|                                            | Pietrain    | 4.56                                  | 0.9-2.5                   |                  |
| SSC17:45-45.5                              | Pietrain    | 8.18                                  | 0.8-2.3                   | PTGIS            |
| SSC13:130.5-131                            | Landrace    | 8.86                                  | 0.9-2.9                   | CBR3             |
|                                            | Pietrain    | 10.40                                 | 1.1-2.8                   |                  |
| SSC1:256-256.5                             | Landrace    | 3.18                                  | 0.8-3.1                   | PTGES            |
|                                            | Large white | 6.75                                  | 0.8-3.23                  |                  |
|                                            | Pietrain    | 9.95                                  | 1.1-3.1                   |                  |
| <b>Mapk signaling pathway</b>              |             |                                       |                           |                  |
| SSC10:9.5-10                               | Duroc       | 8.15                                  | 1.1-3.5                   | DUSP10           |

|                 |             |       |         |           |
|-----------------|-------------|-------|---------|-----------|
|                 | Landrace    | 8.51  | 1.3-3.5 |           |
|                 | Large white | 10.48 | 1.1-3.4 |           |
| SSC14:52-52.5   | Landrace    | 3.84  | 0.7-2.4 | CRKL      |
|                 | Wild boar   | 2.48  | 0.2-2.0 |           |
| SSC7:35.5-36    | Duroc       | 9.64  | 0.9-3.4 | MAPK14    |
|                 | Pietrain    | 8.05  | 1.1-3   |           |
| SSC12:12.5-13   | Large white | 11.3  | 1.1-2.8 | DUSP3     |
| SSC14:127-127.5 | Duroc       | 6.57  | 0.6-2.4 | DUSP5     |
|                 | Large white | 5.7   | 0.7-2.5 |           |
| SSC14:118-118.5 | Landrace    | 7.33  | 0.7-2.4 | FGF8      |
|                 | Pietrain    | 6.6   | 0.7-2.1 |           |
|                 | Wild boar   | 5.5   | 0.5-2.7 |           |
| SSC16:20-20.5   | Large white | 8.94  | 0.9-3.2 | FGF10     |
| SSC14:137.5-138 | Pietrain    | 8.8   | 0.9-2.6 | FGFR2     |
| SSC1:145-150    | Duroc       | 8.1   | 0.9-3.3 | MAP3K7IP2 |
|                 | Landrace    | 9.8   | 1-3.3   |           |
| SSC3:18-18.5    | Duroc       | 6.1   | 0.6-2.2 | MAPK8IP3  |
|                 | Landrace    | 4.2   | 0.9-2.6 |           |
|                 | Large white | 3.7   | 0.8-2.5 |           |
|                 | Pietrain    | 1.1   | 1-2.5   |           |
|                 | Wild boar   | 5.4   | 0.5-2.5 |           |
| SSC7:106-106.5  | Duroc       | 4.8   | 0.7-2.8 | FOS       |
|                 | Large white | 5.6   | 0.6-2.6 |           |
| SSC6:17.5-18    | Landrace    | 6.3   | 0.8-2.3 | FGF21     |
| SSC12:2.5-3     | Pietrain    | 9.6   | 1.2-2.6 | GRB2      |
| SCC4:104-104.5  | Landrace    | 7.0   | 1-3.1   | KRAS      |
|                 | Large white | 6.94  | 0.7-2.7 |           |
|                 | Pietrain    | 7.69  | 0.9-2.6 |           |
| SSC7:81-81.5    | Landrace    | 4.2   | 0.6-2.2 | NFATC4    |
|                 | Large white | 7.0   | 0.7-2.8 |           |
| SSC13:28.5-29   | Duroc       | 6.4   | 0.7-2.5 | CACNA2D3  |
|                 | Landrace    | 5.2   | 0.7-2.3 |           |
|                 | Large white | 5.7   | 0.6-2.3 |           |
| SSC6:19-19.5    | Duroc       | 8.1   | 0.8-2.7 | PRKCG     |
|                 | Landrace    | 5.8   | 0.8-2.3 |           |
| SSC14:51.5-52   | Landrace    | 4.2   | 0.7-2.4 | MAPK1     |
|                 | Large white | 2.9   | 0.4-1.9 |           |
|                 | Pietrain    | 6.3   | 0.6-1.9 |           |
| 6:19-19.5       | Duroc       | 8.1   | 0.8-2.7 | CACNG8    |
|                 | Landrace    | 5.8   | 0.8-2.7 |           |
| 6:19-19.5       | Duroc       | 8.1   | 0.8-2.7 | CACNG7    |
|                 | Landrace    | 5.8   | 0.8-2.3 |           |

|                               |             |      |         |          |
|-------------------------------|-------------|------|---------|----------|
| 6:19-19.5                     | Duroc       | 8.14 | 0.8-2.7 | CACNG6   |
|                               | Landrace    | 5.83 | 0.8-2.7 |          |
| 7:43.5-44                     | Landrace    | 2.23 | 0.7-2.7 | SRF      |
|                               | Pietrain    | 7.2  | 0.9-2.7 |          |
| 13:28-28.5                    | Landrace    | 5.38 | 0.7-2.3 | CACNA1D  |
|                               | Large white | 5.62 | 0.6-2.3 |          |
| 12:8.5-9                      | Landrace    | 6.8  | 1.1-2.7 | CACNG1   |
|                               | Pietrain    | 1.1  | 1.2-2.6 |          |
| 8:74.5-75                     | Pietrain    | 4.5  | 0.5-1.8 | PLA2G12A |
| 9:108-108.5                   | Duroc       | 6.9  | 1-3.2   | MAPKAPK2 |
|                               | Large white | 8.4  | 0.8-2.9 |          |
|                               | Pietrain    | 6.7  | 1.1-2.8 |          |
| <b>p53 signaling pathway</b>  |             |      |         |          |
| SSC9:40-40.5                  | Duroc       | 4.34 | 0.5-2.1 | CHEK1    |
|                               | Landrace    | 3.70 | 0.8-2.5 |          |
|                               | Large white | 4.49 | 0.5-2.2 |          |
|                               | Pietrain    | 4.06 | 0.7-2.1 |          |
| SSC4:33-33.5                  | Pietrain    | 4.81 | 0.5-1.8 | RRM2B    |
| SSC15:48.5-49                 | Duroc       | 3.47 | 0.4-2.1 | RPRM     |
|                               | Large white | 0.0  | 0.1-1.4 |          |
| SSC14:105.5-106               | Duroc       | 3.32 | 0.5-2.2 | PTEN     |
| SSC4:39.5-40                  | Duroc       | 5.13 | 0.6-2.5 | CCNE2    |
| SSC9:40-40.5                  | Duroc       | 4.34 | 0.5-2.1 | EI24     |
|                               | Landrace    | 3.70 | 0.8-2.5 |          |
|                               | Large white | 4.49 | 0.5-2.2 |          |
|                               | Pietrain    | 4.06 | 0.7-2.1 |          |
| <b>Gnrh signaling pathway</b> |             |      |         |          |
| SSC7:35.5-36                  | Duroc       | 9.64 | 0.9-3.3 | MAPK14   |
|                               | Pietrain    | 8.05 | 1-2.9   |          |
| SSC7:81-81.5                  | Landrace    | 4.23 | 0.5-2.2 | ADCY4    |
|                               | Large white | 7.05 | 0.7-2.8 |          |
| SSC2:20-20.5                  | Pietrain    | 6.03 | 0.9-2.5 | FSHB     |
| SSC17:53.5-54                 | Duroc       | 8.17 | 0.8-2.7 | GNAS     |
|                               | Wild boar   | 3.94 | 0.5-2.6 |          |
| SSC4:104-104.5                | Landrace    | 7.00 | 1-3.2   | KRAS     |
|                               | Large white | 6.94 | 0.7-2.8 |          |
|                               | Pietrain    | 7.69 | 0.9-2.6 |          |
| SSC14:51.5-52                 | Landrace    | 4.25 | 0.7-2.4 | MAPK1    |
|                               | Large white | 2.86 | 0.4-1.9 |          |
|                               | Pietrain    | 6.30 | 0.6-1.9 |          |
| SSC13:28-28.5                 | Landrace    | 5.38 | 0.6-2.3 | CACNA1D  |
|                               | Large white | 5.62 | 0.6-2.3 |          |

|                        |             |      |         |          |
|------------------------|-------------|------|---------|----------|
| SSC8:74.5-75           | Pietrain    | 4.51 | 0.5-1.8 | PLA2G12A |
| SSC14:79-79.5          | Landrace    | 1.54 | 0.6-2.2 | CAMK2G   |
| Bladder cancer pathway |             |      |         |          |
| SSC13:25-25.5          | Duroc       | 4.85 | 0.6-2.6 | RASSF1   |
|                        | Landrace    | 7.44 | 0.7-2.6 |          |
| SSC17:33.5-34          | Landrace    | 5.84 | 0.8-2.5 | E2F1     |
| SSC12:15-15.5          | Duroc       | 5.69 | 1-2.7   | ERBB2    |
|                        | Landrace    | 6.45 | 1-2.6   |          |
|                        | Large white | 8.01 | 1-2.9   |          |
| SSC19:7-7.5            | Pietrain    | 2.65 | 0.4-2.2 | FIGF     |
| SSC4:104-104.5         | Landrace    | 7.00 | 1-3.2   | KRAS     |
|                        | Large white | 6.94 | 0.7-2.8 |          |
|                        | Pietrain    | 7.69 | 0.9-2.6 |          |
| SSC14:51.5-52          | Landrace    | 4.25 | 0.7-2.4 | MAPK1    |
|                        | Large white | 2.86 | 0.4-1.9 |          |
|                        | Pietrain    | 6.30 | 0.6-1.9 |          |
| SSC15:30-30.5          | Landrace    | 4.53 | 0.5-2.1 | VEGFC    |
|                        | Wild boar   | 0.0  | 0.4-2.7 |          |
