# Supplementary material for: Genome-Wide Footprints of Pig Domestication and Selection Revealed through Massive Parallel Sequencing of Pooled DNA
Source: PubMed Central journal article supplement (PMC3070695; doi:10.1371/journal.pone.0014782), 2011-04-04
Supplement: pone.0014782.s006.pdf [file pone.0014782.s006.pdf]

## Supplementary Text S1

The modified Watterson estimator that accounts for DNA pooling, sequencing errors and ascertainment bias for singletons is

$$\hat{\theta}_W = \frac{S - \sum_s 10^{-\frac{pSNP(s)}{10}}}{\sum_i L(i) \left( \sum_{j=2}^{\min(n_s(i), n_0)} P_c(j|n_s(i), n_0) a_j - \sum_{k=1}^{n_0-1} \frac{n_s(i)}{n_0} \left( \frac{k}{n_0} \right)^{n_s(i)-2} \right)}$$

where  $S$  is the number of segregating sites that are not singletons,  $pSNP(s)$  is the Phred-scaled probability that the  $s$ th SNP is a sequencing error,  $n_s(i)$  and  $L(i)$  are the read depth of the  $i$ th cluster of sequences (that is, a contiguous region with constant read depth) and  $n_0$  is the number of independent chromosomes in the sample (which is twice the sample size).  $P_c(j|n_s, n_0)$  is the probability that the output of  $n_s$  random extractions (with replacement) from a box of  $n_0$  different objects contains exactly  $j$  different objects. An explicit formula for  $P_c(j|n_s, n_0)$  is

$$P_c(j|n_s, n_0) = \sum_{i=0}^{j-1} (-1)^i \binom{n_0}{j} \binom{j}{i} \left( \frac{j-i}{n_0} \right)^{n_s}$$

The estimator for pairwise nucleotide diversity which includes corrections for sequencing errors and absence of singletons is

$$\hat{\theta}_{\Pi} = \frac{1}{L} \sum_i \left( \frac{n_0}{n_0 - 1 - 2 \sum_{k=1}^{n_0-1} (k/n_0)^{n_s(i)-2}} \right) \frac{2m_i(n_s(i) - m_i)}{n_s(i)(n_s(i) - 1)} \left( 1 - 10^{-\frac{pSNP(i)}{10}} \right)$$

where  $m_i$  is the minor allele count of the  $i$ th SNP.

The formula for  $F_{ST}$  between two populations using the definition of Nei (Molecular Evolutionary Genetics, 1987) is

$$\hat{F}_{ST} = 1 - \frac{\hat{\theta}_{\Pi 1} + \hat{\theta}_{\Pi 2}}{2\Pi_a + c_s(\hat{\theta}_{\Pi 1} + \hat{\theta}_{\Pi 2})}$$

where  $\hat{\theta}_{\Pi 1}$  and  $\hat{\theta}_{\Pi 2}$  are the nucleotide diversity estimators for the two populations,  $\Pi_a$  is the pairwise nucleotide diversity between sequences coming

from different populations and  $c_s$  is a correction factor given by

$$\begin{aligned}
c_s = & \sum_{k=1}^{n_0^{(1)}+n_0^{(2)}-1} \frac{1}{k} \sum_{l=0}^k \frac{\binom{n_0^{(1)}}{k-l} \binom{n_0^{(2)}}{l}}{\binom{n_0^{(1)}+n_0^{(2)}}{k}} \times \\
& \times \left\{ (y_2 - x_2)x_1y_1[y_1^{n_s^{(1)}-2} - x_1^{n_s^{(1)}-2}] + (y_1 - x_1)x_2y_2[y_2^{n_s^{(2)}-2} - x_2^{n_s^{(2)}-2}] + \right. \\
& - (n_s^{(1)} + n_s^{(2)})x_1y_1x_2y_2[x_1^{n_s^{(1)}-2} + y_1^{n_s^{(1)}-2}][x_2^{n_s^{(2)}-2} + y_2^{n_s^{(2)}-2}] + \\
& \left. + 2x_1y_1x_2y_2[x_1^{n_s^{(1)}-2} - y_1^{n_s^{(1)}-2}][x_2^{n_s^{(2)}-2} - y_2^{n_s^{(2)}-2}] \right\}
\end{aligned}$$

with  $x_1 = (k-l)/n_0^{(1)}$ ,  $x_2 = l/n_0^{(2)}$ ,  $y_1 = 1 - x_1$  and  $y_2 = 1 - x_2$ .

The above estimators  $\hat{\theta}_W$ ,  $\hat{\theta}_\Pi$  and  $\Pi_a + c_s(\hat{\theta}_{\Pi 1} + \hat{\theta}_{\Pi 2})/2$  are unbiased estimators of  $\theta$  (Ferretti, Ramos-Onsins and Perez-Enciso, personal communication).
