# Supplementary material for: Genome-Wide Footprints of Pig Domestication and Selection Revealed through Massive Parallel Sequencing of Pooled DNA
Source: PLoS One. 2011 Apr 4;6(4):e14782. doi: 10.1371/journal.pone.0014782 (PMC3070695; doi:10.1371/journal.pone.0014782)
Supplement: Table S1 — Descriptions of breeds sampled. (0.14 MB PDF) [file pone.0014782.s003.pdf]

**Table S1-** Description of breeds sampled

| Breed              | Breed history                                                                                           | Characteristics/Aptitudes                                                                                                                                                                                       | Major faults                                                                                                                                          | Country of origin             | Sample size |
|--------------------|---------------------------------------------------------------------------------------------------------|-----------------------------------------------------------------------------------------------------------------------------------------------------------------------------------------------------------------|-------------------------------------------------------------------------------------------------------------------------------------------------------|-------------------------------|-------------|
| <b>Large White</b> | Origin in England late 1700s from a cross between white pigs from Yorkshire and Chinese pig from Canton | <ul style="list-style-type: none"> <li>• Large litter sizes</li> <li>• Large milk production</li> <li>• Good maternal instincts</li> <li>• Good feet and legs</li> </ul>                                        | <ul style="list-style-type: none"> <li>• Poor ham development</li> </ul>                                                                              | Denmark, USA, The Netherlands | 36          |
| <b>Landrace</b>    | Origin in Denmark from a cross between local wild boars and imported Large White pigs                   | <ul style="list-style-type: none"> <li>• Large size</li> <li>• Large eye muscle</li> <li>• Good carcass quality</li> <li>• Rapid growth</li> <li>• Higher weight on weaning</li> </ul>                          | <ul style="list-style-type: none"> <li>• Leg weakness</li> <li>• Splay legs</li> <li>• Nervous disorders (porcine stress syndrome)</li> </ul>         | Denmark, USA, The Netherlands | 29          |
| <b>Pietrain</b>    | Originated from Pietrain in Belgium, exact origin is unknown                                            | <ul style="list-style-type: none"> <li>• Legs with extreme muscular development</li> <li>• High proportion of lean to fat</li> <li>• Desired for fresh meat production</li> <li>• Used as sire lines</li> </ul> | <ul style="list-style-type: none"> <li>• High mortality due to high frequency of a mutation in the Hal gene</li> <li>• Poorer meat quality</li> </ul> | The Netherlands, USA          | 23          |
| <b>Duroc</b>       | Unknown origin. By ~1800 several red breeds were developed in USA, including the Duroc of New York      | <ul style="list-style-type: none"> <li>• Large size</li> <li>• Heavy carcass production</li> <li>• Use as terminal sire line when crossed with Large White×Landrace sows for bacon production</li> </ul>        | <ul style="list-style-type: none"> <li>• Bad maternal instincts</li> <li>• Lower litter size</li> <li>• Late maturing type</li> </ul>                 | Denmark, USA, The Netherlands | 34          |
